# Supplementary material for: Mechanisms governing the pioneering and redistribution capabilities of the non-classical pioneer PU.1
Source: PubMed Central journal article supplement (PMC6972792; doi:10.1038/s41467-019-13960-2), 2020-01-21
Supplement: 41467_2019_13960_MOESM3_ESM.pdf [file 41467_2019_13960_MOESM3_ESM.pdf]

## Description of Additional Supplementary Files

File Name: Supplementary Data 1

Description: Summary of NGS data generated in this study.

File Name: Supplementary Data 2

Description: gBlocks used for cloning expression plasmids.
